# Supplementary material
Source: publisher figshare collection journal article supplement (https://frontiersin.figshare.com/ndownloader/files/11997836)
Supplement: Supplementary file [file 11997836]

## Supplementary Figure 2

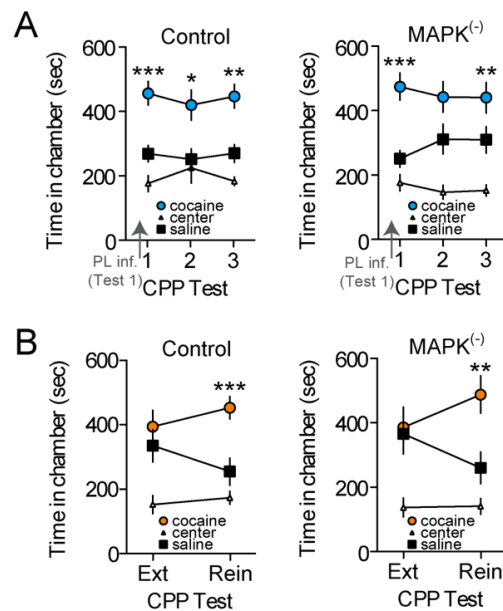

**Supplementary Figure 2 | Disruption of MAPK in PL-mPFC has no effect on cocaine memory retrieval or subsequent reinstatement. A)** Line graphs revealing that rats given PL-mPFC microinfusions of control (left) or both the MAPK inhibitor (right) before the first CPP test only expressed a cocaine CPP across all tests. **B)** Line graphs showing that rats given PL-mPFC microinfusions of control (left) or the MAPK inhibitor (right) before the first CPP test only (shown in A) expressed cocaine-induced reinstatement following extinction. Line graphs represent the mean  $\pm$  SEM. MAPK<sup>(-/-)</sup>, MAPK inhibitor (U0126); \* $p < 0.05$ , \*\* $p < 0.01$ , and \*\*\* $p < 0.001$  versus the saline-paired chamber.
